# Supplementary material
Source: HighWire-hosted journal article supplement (https://www.highwirestage.com/highwire/filestream/70454/field_highwire_adjunct_files/0/AN-AJNR190045_onl_print.pdf)
Supplement: AN-AJNR190045_onl_print.pdf [file AN-AJNR190045_onl_print.pdf]

## ON-LINE APPENDIX

Two interventional neuroradiologists not directly involved in patient treatment independently evaluated anatomic and angiographic results. A senior interventional neuroradiologist solved discrepancies.

### **Definition of Adequately Sized and Undersized WEBs**

In general, WEB size was chosen following the current recommendations for oversizing (in comparison with the aneurysm dimensions) the diameter of the WEB by 1 mm and undersizing the WEB height by 1 mm. Measurements of the aneurysm were performed on 3D rotational angiography, considering the width and the height of the dome outside of additional blebs and daughter aneurysms. This method is supposed to increase the WEB radial force and obtain appropriate anatomic results.<sup>1</sup>

In our study, sizing was assessed by analyzing the aneurysm and WEB device in both working projections and standard projections (anteroposterior, lateral, obliques views); in addition, contrast-enhanced flat panel detector CT was performed at the end of the procedure. An adequately sized WEB was then defined if the cage completely filled the aneurysm sac, with complete wall apposition and satisfactory coverage of the aneurysm neck. Contrariwise, undersized devices were defined by the cage not completely covering the neck. In general, in case of a branching vessel arising from the aneurysm neck, the device was intentionally undersized to avoid WEB bulging and subsequent thromboembolic complications.

Oversizing was generally avoided, and there were no cases of an oversized WEB that was defined as a bulging of the WEB over the neck, impacting the parent artery.

### **Definition of WEB Shape Change**

The modification of the WEB device was classified into 2 groups: no noticeable modifications of the WEB shape and WEB shape change that was defined as a decrease of the height of the device (shortening of the distance between the proximal and distal markers) or a deepening of the proximal and distal concave device recesses during the follow-up. Modifications were evaluated by comparing, in similar nonsubtracted angiographic views, the distance between the distal and proximal markers of the device.<sup>2,3</sup>

## REFERENCES

1. Cognard C, Januel AC. **In reply: WEB aneurysm treatment: occlusion stability and compression.** *Neurosurgery* 2015;77:E667–69 CrossRef Medline
2. Cognard C, Januel AC. **Remnants and recurrences after the use of the WEB intrasaccular device in large-neck bifurcation aneurysms.** *Neurosurgery* 2015;76:522–30; discussion 530 CrossRef Medline
3. Herbreteau D, Bibi R, Narata AP, et al. **Are anatomic results influenced by WEB shape modification? Analysis in a prospective, single-center series of 39 patients with aneurysms treated with the WEB.** *AJNR Am J Neuroradiol* 2016;37:2280–86 CrossRef Medline

**On-line Table 1: Clinical and angiographic data of the analyzed patient population**

| Variables                                             | No./Statistic                    | 95% CI    |
|-------------------------------------------------------|----------------------------------|-----------|
| No. of patients                                       | 86                               |           |
| Proportion of men                                     | 28/86 = 32.5%                    | 23.5–43   |
| Mean age (yr)                                         | 61 ± 11.5                        |           |
| Hypertension                                          | 42/86 = 49%                      | 37–59     |
| Smoking                                               | 39/86 = 45%                      | 32.5–55   |
| Acutely ruptured                                      | 21/86 = 24%                      | 16.5–34.5 |
| Bifurcation aneurysms                                 | 68/86 = 79%                      | 69–86.5   |
| Side wall aneurysms                                   | 18/86 = 21%                      | 13.5–30   |
| Aneurysm location                                     |                                  |           |
| MCA                                                   | 43/86 = 50%                      | 39.6–60   |
| AcomA                                                 | 12/86 = 14%                      | 80–22.9   |
| Carotid-T                                             | 5/86 = 6%                        | 2.2–13.2  |
| PcomA                                                 | 3/86 = 3.5%                      | 0.7–10    |
| ACA                                                   | 4/86 = 4.6%                      | 1.4–11.7  |
| Pericallosal                                          | 2/86 = 2.3%                      | 1.4–11    |
| M1                                                    | 2/86 = 2.3%                      | 1.4–11    |
| Distal MCA                                            | 2/86 = 2.3%                      | 1.4–11    |
| BT                                                    | 13/86 = 15%                      | 8.9–24.3  |
| Mean aneurysm size (maximum dome diameter)            | 5.5 mm (range, 3–11.5, SD ± 1.9) |           |
| Mean aneurysm height                                  | 5.8 mm (range, 3–8.6, SD ± 2.6)  |           |
| Mean dome/ostium ratio                                | 1.4 (SD ± 0.3)                   |           |
| Mean aspect ratio                                     | 1.8 (SD ± 0.6)                   |           |
| Intrasaccular thrombosis                              | 4/86 = 4.6%                      | 1.4–12    |
| Aneurysm with branching vessel coming from the ostium | 50/86 = 58%                      | 47–68     |

**Note:**—PcomA indicates posterior communicating artery; ACA, anterior cerebral artery.

**On-line Table 2: Treatment characteristics and angiographic outcomes**

| Variables                             | Number/Statistic | 95% CI    |
|---------------------------------------|------------------|-----------|
| Type of Web                           |                  |           |
| SL                                    | 78/86 = 91%      | 82–95     |
| SLS                                   | 8/86 = 9%        | 4.5–17.5  |
| Additional stent                      | 13/86 = 15%      | 8.9–24    |
| Neuroform                             | 11/86 = 12.8%    | 7.1–21.6  |
| PED <sup>a</sup>                      | 1/86 = 1.1%      | 0.1–6.9   |
| LEO Baby <sup>b</sup>                 | 1/86 = 1.1%      | 0.1–6.9   |
| Use of the simulation software        | 55/86 = 64%      | 53.4–73.3 |
| Immediate aneurysm occlusion          |                  |           |
| RR 1                                  | 21/86 = 24.5%    | 16.5–34.5 |
| RR 2                                  | 21/86 = 24.5%    | 16.5–34.5 |
| RR 3                                  | 44/86 = 51%      | 40–61.4   |
| Aneurysm occlusion at 6-mo follow-up  |                  |           |
| RR 1                                  | 50/86 = 58.1%    | 47.5–68   |
| RR 2                                  | 22/86 = 25.6%    | 17–35     |
| RR 3                                  | 14/86 = 16.3%    | 9.8–25.6  |
| Aneurysm occlusion at 12-mo follow-up |                  |           |
| RR 1                                  | 49/86 = 57%      | 46–67     |
| RR 2                                  | 19/86 = 22%      | 14.5–32   |
| RR 3                                  | 18/86 = 21%      | 13.5–30   |
| Aneurysm occlusion at 24-mo follow-up |                  |           |
| RR 1                                  | 29/60 = 48.4%    | 36–60     |
| RR 2                                  | 20/60 = 33.3%    | 22–45     |
| RR 3                                  | 11/60 = 18.3%    | 10–30     |
| WEB shape modification <sup>c</sup>   | 19/86 = 22%      | 14–32     |
| At 6 mo                               | 6/86 = 7%        | 3–15      |
| At 12 mo                              | 13/86 = 15%      | 9–24      |
| At 24 mo                              | 0/60 = 0%        |           |
| Aneurysms requiring retreatment       | 11/86 = 13%      | 7.1–21.6  |
| Mean angiographic follow-up           | 17 ± 11.5 mo     |           |

<sup>a</sup> Pipeline Embolization Device (Covidien, Irvine, California).

<sup>b</sup> Balt Extrusion, Montmorency, France.

<sup>c</sup> WEB shape modification was defined as a decrease in height of the device or a deepening of the proximal and distal concave recesses during follow-up.

**On-line Table 3: Univariate and multivariate analysis of predicting factors for aneurysm occlusion during follow-up**

| Independent Variables for Occlusion | Univariate Analysis            |                                  |         | Multivariate Analysis  |                                   |
|-------------------------------------|--------------------------------|----------------------------------|---------|------------------------|-----------------------------------|
|                                     | Adequate Occlusion<br>(n = 74) | Incomplete Occlusion<br>(n = 12) | P Value | Odds Ratio<br>(95% CI) | P Value<br>Odds Ratio<br>(95% CI) |
| Vascular risk factor                |                                |                                  |         |                        |                                   |
| Yes                                 | 47 (63.5%)                     | 9 (75%)                          | .4      | 1.7 (0.4–6.9)          |                                   |
| No                                  | 27 (36.5%)                     | 3 (25%)                          |         |                        |                                   |
| Acutely ruptured                    |                                |                                  |         |                        |                                   |
| Yes                                 | 19 (25.6%)                     | 2 (16.4%)                        | .5      | 0.5 (0.1–2.8)          |                                   |
| No                                  | 55 (74.3%)                     | 10 (83.4%)                       |         |                        |                                   |
| Aneurysm location                   |                                |                                  |         |                        |                                   |
| PC                                  | 10 (13.5%)                     | 3 (25%)                          | .3      | 0.4 (0.1–2)            |                                   |
| AC                                  | 64 (86.5%)                     | 9 (75%)                          |         |                        |                                   |
| Aneurysm location                   |                                |                                  |         |                        |                                   |
| MCA                                 | 38 (51.4%)                     | 6 (50%)                          | .9      | 1.1 (0.3–3.5)          |                                   |
| Other                               | 36 (48.6%)                     | 6 (50%)                          |         |                        |                                   |
| Aneurysm location                   |                                |                                  |         |                        |                                   |
| AcomA                               | 11 (15%)                       | 0 (0%)                           | .1      | 1.2 (1.1–1.3)          | .9 1.5 (0.3–3.2)                  |
| Other                               | 63 (85%)                       | 12 (100%)                        |         |                        |                                   |
| Aneurysm location                   |                                |                                  |         |                        |                                   |
| BT                                  | 11 (15%)                       | 1 (8.4%)                         | .5      | 1.9 (0.2–16.4)         |                                   |
| Other                               | 63 (85%)                       | 11 (91.6%)                       |         |                        |                                   |
| Bifurcation point                   |                                |                                  |         |                        |                                   |
| Yes                                 | 67 (90%)                       | 1 (8.4%)                         | .9      | 1.1 (0.1–10.2)         |                                   |
| No                                  | 7 (10%)                        | 11 (91.6%)                       |         |                        |                                   |
| Aneurysm shape                      |                                |                                  |         |                        |                                   |
| Regular                             | 51 (69%)                       | 4 (33%)                          | .01     | 4.4 (1.2–16.2)         | .01 5.9 (1.4–24)                  |
| Irregular                           | 23 (31%)                       | 8 (67%)                          |         |                        |                                   |
| Wide neck                           |                                |                                  |         |                        |                                   |
| Yes                                 | 30 (41%)                       | 11 (91.6%)                       | .03     | 0.1 (0.01–1)           | .04 0.2 (0.01–1)                  |
| No                                  | 44 (59%)                       | 1 (8.4%)                         |         |                        |                                   |
| Vessel coming from the aneurysm     |                                |                                  |         |                        |                                   |
| Yes                                 | 43 (58%)                       | 7 (58%)                          | .9      | 1 (0.3–3.4)            |                                   |
| No                                  | 31 (42%)                       | 5 (42%)                          |         |                        |                                   |
| Additional stent                    |                                |                                  |         |                        |                                   |
| Yes                                 | 10 (13.5%)                     | 3 (25%)                          | .3      | 2.1 (0.4–9.2)          |                                   |
| No                                  | 64 (86.5%)                     | 9 (75%)                          |         |                        |                                   |
| Sizing                              |                                |                                  |         |                        |                                   |
| Correctly sized                     | 46 (62%)                       | 5 (42%)                          | .2      | 2.3 (0.6–7.9)          |                                   |
| Undersized                          | 28 (38%)                       | 7 (58%)                          |         |                        |                                   |
| WEB shape modification              |                                |                                  |         |                        |                                   |
| No                                  | 61 (82.5%)                     | 6 (50%)                          | .01     | 4.6 (1.3–16.8)         | .8 1.5 (0.04–51)                  |
| Yes                                 | 13 (17.5%)                     | 6 (50%)                          |         |                        |                                   |
| Immediate occlusion                 |                                |                                  |         |                        |                                   |
| Yes                                 | 38 (51%)                       | 4 (33%)                          | .1      | 2.1 (0.5–7.6)          | .2 2.7 (0.6–11)                   |
| No                                  | 36 (49%)                       | 8 (67%)                          |         |                        |                                   |
| Age (mean) (yr)                     | 61 ± 11                        | 60 ± 14                          | .4      | 0.9 (0.8–1)            |                                   |
| Aneurysm dome size                  | 6 ± 2.3                        | 7.6 ± 2.4                        | .9      | 1.5 (1.1–1.8)          |                                   |
| Dome/ostium ratio                   | 1.4 ± 0.3                      | 1.3 ± 0.3                        | .7      | 3.1 (0.5–33)           |                                   |
| Aspect ratio                        | 1.5 ± 0.5                      | 1.7 ± 0.5                        | .7      | 0.7 (0.2–2.6)          |                                   |

**Note:**—PC indicates posterior circulation; AC, anterior circulation.

**On-line Table 4: Univariate and multivariate analyses of predicting factors for WEB shape modification during follow-up**

| Independent Variables for WEB Shape Modification | Univariate Analysis                 |                                  |         |                     | Multivariate Analysis |                     |
|--------------------------------------------------|-------------------------------------|----------------------------------|---------|---------------------|-----------------------|---------------------|
|                                                  | No WEB Shape Modifications (n = 67) | WEB Shape Modifications (n = 19) | P Value | Odds Ratio (95% CI) | P Value               | Odds Ratio (95% CI) |
| Vascular risk factor                             |                                     |                                  |         |                     |                       |                     |
| Yes                                              | 43 (64%)                            | 6 (31.5%)                        | .7      | 1.2 (0.4–3.5)       |                       |                     |
| No                                               | 24 (36%)                            | 13 (68.5%)                       |         |                     |                       |                     |
| Acutely ruptured                                 |                                     |                                  |         |                     |                       |                     |
| Yes                                              | 17 (25.3%)                          | 4 (21%)                          | .6      | 0.7 (0.2–2.6)       |                       |                     |
| No                                               | 50 (74.7%)                          | 15 (79%)                         |         |                     |                       |                     |
| Aneurysm location                                |                                     |                                  |         |                     |                       |                     |
| PC                                               | 10 (15%)                            | 3 (15.8%)                        | .2      | 0.9 (0.2–3.8)       |                       |                     |
| AC                                               | 57 (85%)                            | 16 (84.2%)                       |         |                     |                       |                     |
| Aneurysm location                                |                                     |                                  |         |                     |                       |                     |
| MCA                                              | 32 (47.7%)                          | 12 (63%)                         | .2      | 0.5 (0.2–1.5)       |                       |                     |
| Other                                            | 35 (52.3%)                          | 7 (37%)                          |         |                     |                       |                     |
| Aneurysm location                                |                                     |                                  |         |                     |                       |                     |
| AcomA                                            | 8 (12%)                             | 3 (16%)                          | .6      | 0.7 (0.1–3)         |                       |                     |
| Other                                            | 59 (88%)                            | 16 (84%)                         |         |                     |                       |                     |
| Aneurysm location                                |                                     |                                  |         |                     |                       |                     |
| BT                                               | 10 (15%)                            | 2 (10.5%)                        | .6      | 1.4 (0.3–7.4)       |                       |                     |
| Other                                            | 57 (85%)                            | 17 (89.5%)                       |         |                     |                       |                     |
| Bifurcation point                                |                                     |                                  |         |                     |                       |                     |
| Yes                                              | 60 (89.5%)                          | 18 (95%)                         | .4      | 2.1 (0.2–18)        |                       |                     |
| No                                               | 7 (10.5%)                           | 1 (5%)                           |         |                     |                       |                     |
| Aneurysm shape                                   |                                     |                                  |         |                     |                       |                     |
| Irregular                                        | 19 (28.4%)                          | 12 (63%)                         | .005    | 4.3 (1.4–12.6)      | .01                   | 5.4 (1.4–19)        |
| Regular                                          | 48 (71.6%)                          | 7 (37%)                          |         |                     |                       |                     |
| Wide ostium                                      |                                     |                                  |         |                     |                       |                     |
| No                                               | 30 (45%)                            | 1 (5%)                           | .002    | 14.5 (1.8–115)      | .03                   | 9.8 (1.6–60)        |
| Yes                                              | 37 (55%)                            | 18 (95%)                         |         |                     |                       |                     |
| Vessel coming from the aneurysm                  |                                     |                                  |         |                     |                       |                     |
| Yes                                              | 31 (46%)                            | 5 (26%)                          | .3      | 1.4 (0.7–7.4)       |                       |                     |
| No                                               | 36 (54%)                            | 14 (74%)                         |         |                     |                       |                     |
| Additional stent                                 |                                     |                                  |         |                     |                       |                     |
| No                                               | 59 (88%)                            | 14 (74%)                         | .1      | 2.6 (0.7–9.2)       | .8                    | 1.1 (0.2–5.4)       |
| Yes                                              | 8 (12%)                             | 5 (26%)                          |         |                     |                       |                     |
| Sizing                                           |                                     |                                  |         |                     |                       |                     |
| Correctly sized                                  | 43 (64%)                            | 8 (42%)                          | .08     | 2.5 (0.8–6.9)       | .2                    | 0.3 (0.1–11)        |
| Undersized                                       | 24 (36%)                            | 11 (58%)                         |         |                     |                       |                     |
| Immediate occlusion                              |                                     |                                  |         |                     |                       |                     |
| Yes                                              | 31 (46%)                            | 11 (58%)                         | .3      | 0.6 (0.2–1.7)       |                       |                     |
| No                                               | 36 (54%)                            | 8 (42%)                          |         |                     |                       |                     |
| Age (mean) (yr)                                  | 62 (SD = 11)                        | 55 (SD = 11)                     | .6      | 0.9 (0.9–1.1)       |                       |                     |
| Aneurysm dome size                               | 5 (SD = 1.9)                        | 8 (SD = 3.1)                     | .01     | 1.1 (0.9–1.3)       | .06                   | 1.3 (0.9–1.6)       |
| Dome/ostium ratio                                | 1.3 (SD = 0.3)                      | 1.5 (SD = 0.3)                   | .4      | 0.4 (0.07–3.2)      |                       |                     |
| Aspect ratio                                     | 1.4 (SD = 0.6)                      | 1.5 (SD = 0.4)                   | .5      | 1.4 (0.5–3.8)       |                       |                     |

**Note:**—PC indicates posterior circulation; AC, anterior circulation.
